# Supplementary material for: Identification of Cancer Hub Gene Signatures Associated with Immune-Suppressive Tumor Microenvironment and Ovatodiolide as a Potential Cancer Immunotherapeutic Agent
Source: MDPI journal article supplement (doi:10.3390/cancers13153847), 2021-07-30
Supplement: s1 [file s1]

# Supplementary Material: Identification of Cancer Hub Gene Signatures Associated with Immune-Suppressive Tumor Microenvironment and Ovatodiolide as a Potential Cancer Immunotherapeutic Agent

Jia-Hong Chen, Alexander T. H. Wu, Bashir Lawal, David T. W. Tzeng, Jih-Chin Lee, Ching-Liang Ho and Tsu-Yi Chao

**Table S1.** Mutation frequency of the hub genes in the hub cancers.

| Cancer type | Symbol        | EffectiveMut | NonEffectiveMut | Sample Size | Percentage | Entrez |
|-------------|---------------|--------------|-----------------|-------------|------------|--------|
| BRCA        | <i>IRAK3</i>  | 5            | 3               | 1026        | 0.487329   | 11213  |
| COAD        | <i>IRAK3</i>  | 9            | 3               | 407         | 2.211302   | 11213  |
| LIHC        | <i>IRAK3</i>  | 4            | 1               | 365         | 1.09589    | 11213  |
| LUAD        | <i>IRAK3</i>  | 4            | 6               | 567         | 0.705467   | 11213  |
| PRAD        | <i>IRAK3</i>  | 5            | 1               | 498         | 1.004016   | 11213  |
| STAD        | <i>IRAK3</i>  | 8            | 5               | 439         | 1.822323   | 11213  |
| BRCA        | <i>LIN9</i>   | 7            | 4               | 1026        | 0.682261   | 286826 |
| COAD        | <i>LIN9</i>   | 5            | 3               | 407         | 1.228501   | 286826 |
| LUAD        | <i>LIN9</i>   | 7            | 0               | 567         | 1.234568   | 286826 |
| PRAD        | <i>LIN9</i>   | 1            | 0               | 498         | 0.200803   | 286826 |
| STAD        | <i>LIN9</i>   | 6            | 3               | 439         | 1.366743   | 286826 |
| BRCA        | <i>OBSCN</i>  | 47           | 30              | 1026        | 4.580897   | 84033  |
| COAD        | <i>OBSCN</i>  | 97           | 58              | 407         | 23.83292   | 84033  |
| LIHC        | <i>OBSCN</i>  | 38           | 19              | 365         | 10.41096   | 84033  |
| LUAD        | <i>OBSCN</i>  | 93           | 52              | 567         | 16.40212   | 84033  |
| PRAD        | <i>OBSCN</i>  | 16           | 11              | 498         | 3.212851   | 84033  |
| STAD        | <i>OBSCN</i>  | 83           | 60              | 439         | 18.90661   | 84033  |
| BRCA        | <i>RAB31</i>  | 2            | 1               | 1026        | 0.194932   | 11031  |
| COAD        | <i>RAB31</i>  | 3            | 0               | 407         | 0.737101   | 11031  |
| LIHC        | <i>RAB31</i>  | 2            | 0               | 365         | 0.547945   | 11031  |
| LUAD        | <i>RAB31</i>  | 3            | 1               | 567         | 0.529101   | 11031  |
| BRCA        | <i>SEC16B</i> | 15           | 7               | 1026        | 1.461988   | 89866  |
| COAD        | <i>SEC16B</i> | 11           | 9               | 407         | 2.702703   | 89866  |
| LIHC        | <i>SEC16B</i> | 2            | 1               | 365         | 0.547945   | 89866  |
| LUAD        | <i>SEC16B</i> | 14           | 3               | 567         | 2.469136   | 89866  |
| PRAD        | <i>SEC16B</i> | 3            | 1               | 498         | 0.60241    | 89866  |
| STAD        | <i>SEC16B</i> | 5            | 1               | 439         | 1.138952   | 89866  |
| BRCA        | <i>TNPO2</i>  | 5            | 4               | 1026        | 0.487329   | 30000  |
| COAD        | <i>TNPO2</i>  | 10           | 6               | 407         | 2.457002   | 30000  |
| LIHC        | <i>TNPO2</i>  | 2            | 1               | 365         | 0.547945   | 30000  |
| LUAD        | <i>TNPO2</i>  | 5            | 2               | 567         | 0.881834   | 30000  |
| PRAD        | <i>TNPO2</i>  | 1            | 0               | 498         | 0.200803   | 30000  |
| STAD        | <i>TNPO2</i>  | 12           | 4               | 439         | 2.733485   | 30000  |

**Table S2.** Correlation of gene expression and tumor infiltration of the immune cells in hub cancer.

| Cancer | Variable       | <i>RAB31</i> | <i>IRAK3</i> | <i>OBSCN</i> | <i>LIN9</i> | <i>TNPO2</i> | <i>SEC16B</i> |
|--------|----------------|--------------|--------------|--------------|-------------|--------------|---------------|
| BRCA   | Purity         | -0.07114     | -0.39882     | -0.0793      | 0.138495    | 0.11875      | -0.22121      |
| BRCA   | B Cell         | 0.028272     | 0.153182     | -0.08747     | 0.17233     |              |               |
| BRCA   | CD8+ T Cell    | 0.206092     | 0.430456     | -0.16596     | 0.198325    | 0.112571     | 0.069031      |
| BRCA   | CD4+ T Cell    | 0.128787     | 0.366357     | 0.198201     | 0.136632    | 0.20206      | 0.270966      |
| BRCA   | Macrophage     | 0.424807     | 0.376069     | -0.10949     |             |              | 0.177569      |
| BRCA   | Neutrophil     | 0.222228     | 0.397411     |              | 0.209792    | 0.172728     | 0.132569      |
| BRCA   | Dendritic Cell | 0.197187     | 0.363863     |              | 0.151738    | 0.09814      | 0.089549      |
| COAD   | Purity         | -0.40478     | -0.32391     |              | 0.098922    |              | 0.10333       |
| COAD   | B Cell         | 0.173817     | 0.256238     | -0.1289      | 0.237989    |              | 0.120667      |
| COAD   | CD8+ T Cell    | 0.381718     | 0.389297     |              | 0.302618    | -0.12165     |               |

|      |                |          |          |          |          |          |          |
|------|----------------|----------|----------|----------|----------|----------|----------|
| COAD | CD4+ T Cell    | 0.435098 | 0.422662 | 0.110091 |          | 0.434489 | 0.278879 |
| COAD | Macrophage     | 0.70418  | 0.535847 | 0.176062 | 0.185667 | 0.111776 |          |
| COAD | Neutrophil     | 0.651601 | 0.56247  |          | 0.264135 |          |          |
| COAD | Dendritic Cell | 0.653389 | 0.548536 |          | 0.178367 | 0.112063 |          |
| LIHC | Purity         | -0.49643 | -0.45706 | -0.21289 | 0.216315 |          | 0.11     |
| LIHC | B Cell         | 0.421792 | 0.250275 | 0.278656 | 0.387734 | 0.237761 |          |
| LIHC | CD8+ T Cell    | 0.484147 | 0.338181 | 0.208561 | 0.248836 | 0.16781  | -0.17703 |
| LIHC | CD4+ T Cell    | 0.5219   | 0.431311 | 0.474799 | 0.460894 | 0.501213 |          |
| LIHC | Macrophage     | 0.681213 | 0.478544 | 0.474776 | 0.44294  | 0.417728 | -0.10642 |
| LIHC | Neutrophil     | 0.584799 | 0.565076 | 0.299182 | 0.408033 | 0.382461 |          |
| LIHC | Dendritic Cell | 0.662407 | 0.450874 | 0.283084 | 0.397766 | 0.334517 |          |
| LUAD | Purity         | -0.26168 | -0.27775 |          | 0.133162 |          | -0.0932  |
| LUAD | B Cell         | -0.02583 | 0.307063 |          | -0.18291 |          |          |
| LUAD | CD8+ T Cell    | 0.266995 | 0.201114 | -0.18584 | 0.145957 |          | -0.09153 |
| LUAD | CD4+ T Cell    | 0.102133 | 0.299907 | 0.232341 | -0.1754  | 0.306938 | 0.269201 |
| LUAD | Macrophage     | 0.350957 | 0.312079 |          |          |          |          |
| LUAD | Neutrophil     | 0.452357 | 0.449962 |          | 0.109917 | 0.141522 |          |
| LUAD | Dendritic Cell | 0.390715 | 0.401976 |          |          |          |          |
| PRAD | Purity         | -0.45332 | -0.4882  | -0.28497 |          |          |          |
| PRAD | B Cell         | 0.596777 | 0.494273 | 0.155744 | 0.450827 | 0.387525 | 0.291824 |
| PRAD | CD8+ T Cell    | 0.484187 | 0.635431 |          | 0.412507 | 0.441604 | 0.318523 |
| PRAD | CD4+ T Cell    | 0.520793 | 0.371931 | 0.358228 | 0.184186 | 0.133199 | 0.179781 |
| PRAD | Macrophage     | 0.651215 | 0.612966 | 0.223254 | 0.326646 | 0.384702 | 0.267597 |
| PRAD | Neutrophil     | 0.618639 | 0.571184 | 0.3201   | 0.402695 | 0.373526 | 0.341577 |
| PRAD | Dendritic Cell | 0.729857 | 0.611958 | 0.141348 | 0.352691 | 0.329695 | 0.283255 |
| STAD | Purity         | -0.21219 | -0.14336 |          | 0.188238 | 0.112129 |          |
| STAD | B Cell         | -0.1376  | 0.06274  | 0.180881 |          |          | 0.131509 |
| STAD | CD8+ T Cell    | 0.266926 | 0.305153 | -0.11899 | -0.1689  |          |          |
| STAD | CD4+ T Cell    | 0.356594 | 0.205684 | 0.261254 | -0.11785 | 0.231008 | 0.146137 |
| STAD | Macrophage     | 0.704372 | 0.318358 |          | -0.2204  |          |          |
| STAD | Neutrophil     | 0.415955 | 0.342417 | -0.13586 | -0.11733 |          |          |
| STAD | Dendritic Cell | 0.550791 | 0.345729 |          | -0.19096 |          |          |

**Table S3.** Correlation of gene expression and tumor infiltration of the immunosuppressive cells.

| CAF  | <i>RAB31</i> | <i>IRAK3</i> | <i>OBSCN</i> | <i>LIN9</i> | <i>TNPO2</i> | <i>SEC16B</i> |
|------|--------------|--------------|--------------|-------------|--------------|---------------|
| BRCA | 0.555        | 0.321        | 0.14         | -0.219      | -0.128       | 0.254         |
| COAD | 0.945        | 0.5114       | 0.145        | -0.139      | 0.24         | -0.138        |
| LIHC | 0.701        | 0.523        | 0.266        | 0.184       | 0.335        |               |
| LUAD | 0.541        | 0.132        |              | -0.291      | 0.283        |               |
| PRAD | 0.78         | 0.694        | 0.126        | 0.225       | 0.22         | 0.137         |
| STAD | 0.863        | 0.166        | 0.162        | -0.343      | 0.152        | -0.218        |
| MDSC | <i>RAB31</i> | <i>IRAK3</i> | <i>OBSCN</i> | <i>LIN9</i> | <i>TNPO2</i> | <i>SEC16B</i> |
| BRCA | -0.186       | -0.305       |              | 0.424       | 0.346        | -0.232        |
| COAD | -0.283       | -0.349       |              | 0.23        | 0.13         | -0.158        |
| LIHC | 0.204        |              | 0.352        | 0.58        | 0.398        | -0.271        |
| LUAD |              |              |              | 0.44        | 0.273        | -0.121        |
| PRAD | -0.233       | -0.358       | -0.147       | 0.174       | 0.127        | -0.101        |
| STAD | -0.305       | -0.351       | 0.123        | 0.353       | 0.059        | -0.16         |
| TAM  | <i>RAB31</i> | <i>IRAK3</i> | <i>OBSCN</i> | <i>LIN9</i> | <i>TNPO2</i> | <i>SEC16B</i> |
| BRCA | -5.993       | -3.2         |              | -0.27       |              | -0.01         |
| COAD | -5.24        | -3.65        |              |             |              | -0.01         |
| LIHC | -4.95        | -2.90        |              |             | -0.14        | -0.04         |
| LUAD | -5.90        | -3.02        |              | -0.136      | -0.18        | -0.01         |
| PRAD | -6.04        | -2.93        | -2.54        | -0.199      | -0.23        | -0.146        |
| STAD | -5.01        | -3.34        | 0.15         | -0.213      | -0.19        | -0.179        |
| TREG | <i>RAB31</i> | <i>IRAK3</i> | <i>OBSCN</i> | <i>LIN9</i> | <i>TNPO2</i> | <i>SEC16B</i> |
| BRCA | 0.238        | 0.282        | 0.245        | 0.166       | 0.186        | 0.152         |
| COAD | 0.487        | 0.415        |              | 0.123       | 0.287        | 0.19          |
| LIHC | 0.453        | 0.405        | 0.361        | 0.416       | 0.369        | 0.236         |
| LUAD | 0.387        | 0.525        | 0.166        |             | 0.257        | 0.123         |

|      |       |       |       |       |       |       |
|------|-------|-------|-------|-------|-------|-------|
| PRAD | 0.504 | 0.473 | 0.209 | 0.359 | 0.317 | 0.224 |
| STAD | 0.365 | 0.364 | 0.247 | 0.104 | 0.309 | 0.217 |

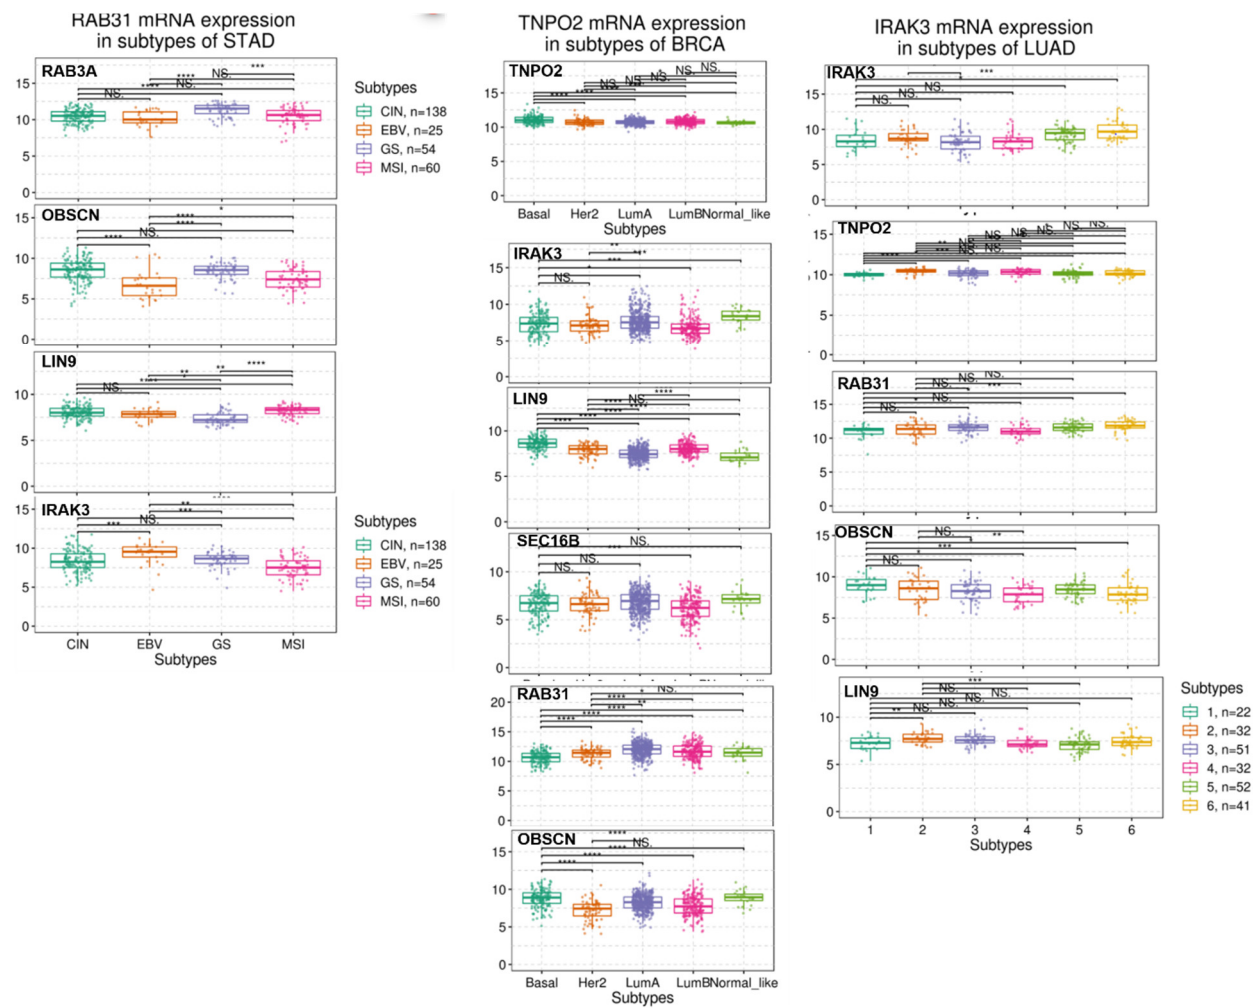

Figure S1. Summary the associations between subtypes and gene expression.

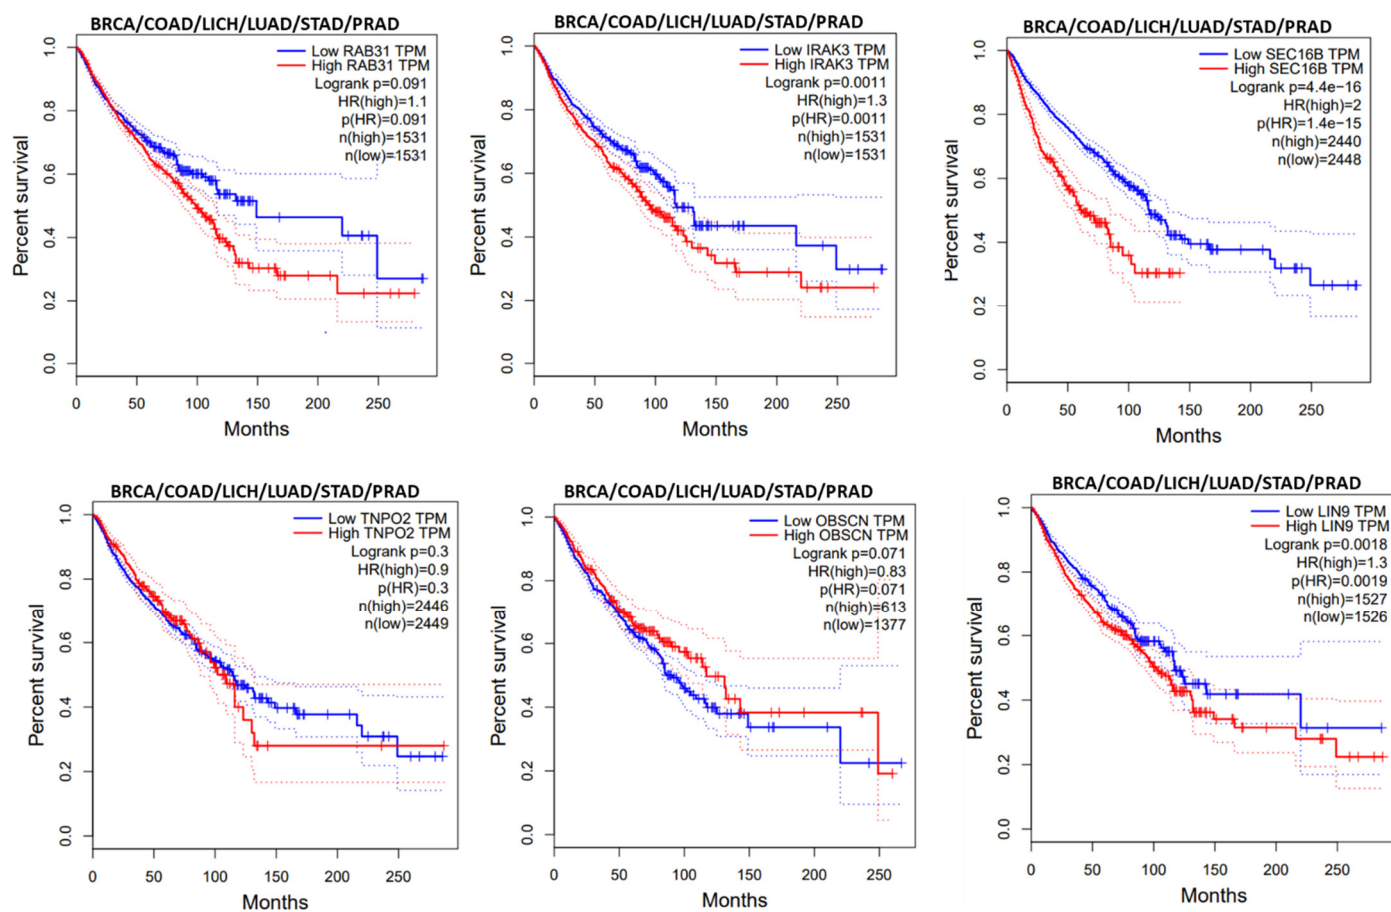

**Figure S2:** Kaplan–Meir plots survival differences between the mRNA expression levels of the hub genes in the combined cohorts of the hub cancer.

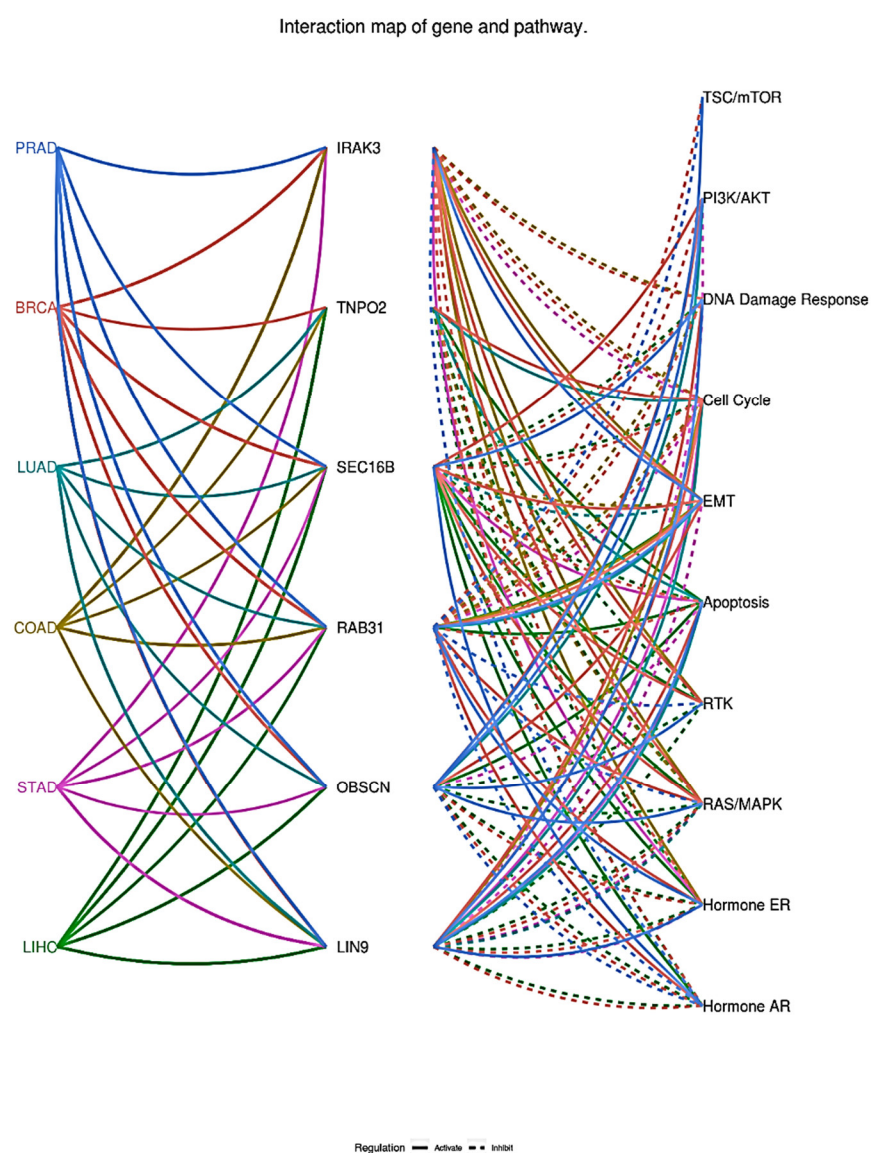

**Figure S3.** Interaction map of the hub genes and pathway.
